# Supplementary material for: Synergistic effects of Ligilactobacillus salivarius Li01 and psyllium husk prevent mice from developing loperamide-induced constipation
Source: Royal Society of Chemistry journal article supplement (doi:10.1039/d4fo04444d), 2024-01-01
Supplement: d4fo04444d1.pdf [file d4fo04444d1.pdf]

## Supplementary materials

**Table S1** Primer sequences for qRT-PCR (related to Materials and methods 2.13 and Figure S1)

| Gene name | Forward sequence      | Reverse sequence        |
|-----------|-----------------------|-------------------------|
| Cyp7a1    | GCTGTGGTAGTGAGCTGTTG  | GTTGTCCAAAGGAGGTTCCACC  |
| Cyp8b1    | CACGGGGATGTCTTCACGG   | TGAGCACCAGTTCTTTTGCATAG |
| Cyp27a1   | GCACAGGAGAGTACGGAGG   | CGGGCAAGTGCAGCACATA     |
| Cyp7b1    | GGAGCCACGACCCTAGATG   | GCCATGCCAAGATAAGGAAGC   |
| Gapdh     | AGGTCGGTGTGAACGGATTTG | GGGGTCGTTGATGGCAACA     |

**Table S2**

| Bile Acids                         | Ctrl     | LOP      | LOPL     | LOPP     | LOPLP    |
|------------------------------------|----------|----------|----------|----------|----------|
| Lithocholic Acid                   | 980.85   | 329.56   | 354.51   | 509.79   | 481.42   |
| Chenodeoxycholic Acid              | 168.28   | 27.46    | 9.29     | 43.39    | 38.56    |
| Deoxycholic Acid                   | 24473.75 | 12261.93 | 9069.43  | 10086.58 | 12292.09 |
| Ursodeoxycholic Acid               | 1205.34  | 423.37   | 150.55   | 208.27   | 246.57   |
| Cholic Acid                        | 20897.20 | 8321.88  | 1356.13  | 4069.40  | 1674.32  |
| Deoxycholic Acid Glycine Conjugate | 27.17    | 7.55     | 4.17     | 5.68     | 7.75     |
| Glycocholic Acid                   | 29.23    | 25.23    | 26.49    | 24.19    | 25.63    |
| Lithocholytaurine                  | 19.83    | 7.29     | 2.00     | 4.17     | 3.73     |
| Tauroursodeoxycholic Acid          | 928.09   | 16.58    | 9.00     | 15.08    | 14.59    |
| Taurodeoxycholic Acid              | 164.45   | 26.22    | 10.91    | 20.67    | 17.45    |
| Taurochenodesoxycholic Acid        | 3.78     | 1.22     | 0.60     | 15.34    | 2.02     |
| Taurocholic Acid                   | 3731.13  | 177.25   | 68.95    | 157.00   | 91.30    |
| Epiallolithocholic Acid            | 328.85   | 136.91   | 141.98   | 140.39   | 177.48   |
| 23-Norcholic Acid                  | 11.03    | 29.24    | 28.45    | 33.03    | 22.83    |
| Hyodeoxycholic Acid                | 10431.40 | 2988.91  | 3716.45  | 934.07   | 9977.49  |
| $\alpha$ Muricholic Acid           | 33837.44 | 24703.06 | 18697.91 | 17508.09 | 17151.03 |
| 12-Ketolithocholic Acid            | 3073.78  | 798.12   | 587.31   | 851.04   | 930.62   |
| Glycohyodeoxycholic Acid           | 9.35     | 4.95     | 3.81     | 4.32     | 5.96     |
| 6,7-Diketolithocholic Acid         | 4.93     | 4.87     | 2.29     | 3.62     | 2.15     |
| $\beta$ -Muricholic Acid           | 17726.31 | 16321.57 | 4769.01  | 5002.49  | 6843.23  |
| Tauro- $\alpha$ -Muricholic Acid   | 6357.30  | 281.98   | 77.22    | 110.33   | 115.81   |
| 7,12-Diketolithocholic Acid        | 23.30    | 15.19    | 4.76     | 9.25     | 4.79     |
| Taurohyodeoxycholic Acid           | 503.51   | 11.58    | 4.37     | /        | 33.96    |
| 3 $\beta$ -Cholic Acid             | 1236.47  | 467.91   | 20.66    | 257.16   | 261.34   |
| Ursocholic Acid                    | 286.61   | 213.88   | 39.00    | 116.25   | 74.87    |
| Isolithocholic Acid                | 277.79   | 88.98    | 97.65    | 114.79   | 130.05   |

|                                               |         |         |        |        |         |
|-----------------------------------------------|---------|---------|--------|--------|---------|
| Murideoxycholic Acid                          | 4630.00 | 1449.66 | 724.19 | 400.57 | 2389.75 |
| Hyochoolic Acid                               | 369.67  | 229.86  | 88.55  | 333.59 | 118.90  |
| Allochoolic Acid                              | 1893.01 | 2161.27 | 728.21 | 743.27 | 856.82  |
| Tauro- $\beta$ -Muricholic Acid (Sodium Salt) | 6089.54 | 281.19  | 79.58  | 112.98 | 112.60  |
| Nor-Desoxycholic Acid                         | 38.46   | 16.47   | 11.59  | 3.71   | 11.63   |

**Table S3**

| <b>Bile Acids</b>                        | <b>Ctrl</b>   | <b>LOP</b>    | <b>LOPL</b>   | <b>LOPP</b>  | <b>LOPLP</b>  |
|------------------------------------------|---------------|---------------|---------------|--------------|---------------|
| Chenodeoxycholic Acid                    | 2824.26       | 17.42         | 7295.77       | 8.38         | 16865.67      |
| Ursodeoxycholic Acid                     | 4775.68       | /             | 2705.89       | /            | 6009.59       |
| Cholic Acid                              | 29.59         | /             | 9.63          | /            | 13.51         |
| Glycocholic Acid                         | 60.84         | 25.21         | 47.95         | 42.29        | 67.75         |
| Tauroursodeoxycholic Acid                | 9060.71       | 15269.42      | 20980.06      | 27432.5<br>5 | 23517.51      |
| Taurochenodesoxycholic Acid              | 5784.63       | 16245.65      | 13986.94      | 33117.3<br>5 | 12695.09      |
| Taurocholic Acid                         | 91111.75      | 115986.6<br>4 | 130690.5<br>2 | 196543.54    | 168895.3<br>1 |
| Epiallolithocholic Acid                  | 12551.83      | 4701.97       | 8302.82       | 10150.4<br>2 | 17916.85      |
| 23-Norcholeic Acid                       | 101.02        | 120.33        | 127.10        | 153.83       | 149.13        |
| Alpha Muricholic Acid                    | 35585.65      | 46.59         | 1604.86       | 58.35        | 2745.15       |
| 6,7-Diketolithocholic Acid               | 15.62         | /             | 9.53          | /            | 15.36         |
| Beta-Muricholic Acid                     | 162686.0<br>2 | 469.58        | 24826.81      | 566.21       | 48448.89      |
| Tauro-Alpha-Muricholic Acid              | 14804.92      | 37939.66      | 44450.13      | 53134.6<br>5 | 56000.59      |
| 7-Ketolithocholic Acid                   | 1608.63       | /             | 752.93        | /            | /             |
| Ursocholic Acid                          | /             | 15.14         | 38.39         | 26.83        | 60.95         |
| Murideoxycholic Acid                     | 1159.16       | /             | /             | /            | /             |
| Hyochoolic Acid                          | 252462.1<br>5 | 1629.77       | 272244.1<br>0 | 1030.28      | 745491.3<br>1 |
| Allochoolic Acid                         | 10747.22      | /             | /             | /            | /             |
| Tauro-Beta-Muricholic Acid (Sodium Salt) | 20591.35      | 39569.39      | 48635.92      | 55357.5<br>8 | 57079.90      |
| 3-oxodeoxycholic acid                    | 179.57        | /             | 282.41        | /            | 544.80        |
| 3-Oxocholeic acid                        | 2580.86       | /             | 2052.48       | /            | 5387.06       |
| 12-Oxochenodeoxycholic acid              | 3.81          | /             | 0.21          | /            | 1.17          |
| choleic acid 7 sulfate                   | 49351.55      | 11884.24      | 9942.06       | 11741.5<br>7 | 16487.61      |
| 7-Ketodeoxycholic acid                   | 798.07        | 207.15        | 583.41        | 275.83       | 877.82        |

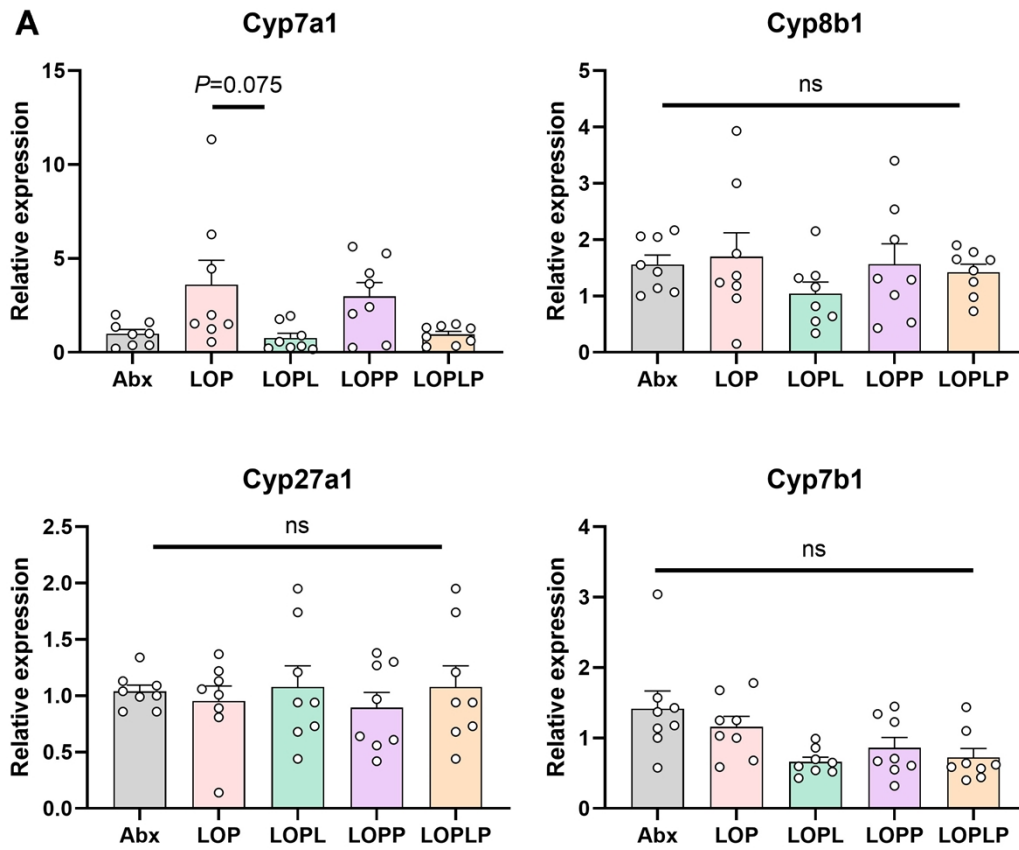

**Figure S1.** Gene expression related to hepatic bile acid synthetase in constipated mice after Abx intervention. (A) The expression of Cyp7a1, Cyp8b1, Cyp27a1 and Cyp7b1.
