# Supplementary figures and images for: Synergistic effects of Ligilactobacillus salivarius Li01 and psyllium husk prevent mice from developing loperamide-induced constipation
Source: Royal Society of Chemistry journal article supplement (doi:10.1039/d4fo04444d), 2024-01-01

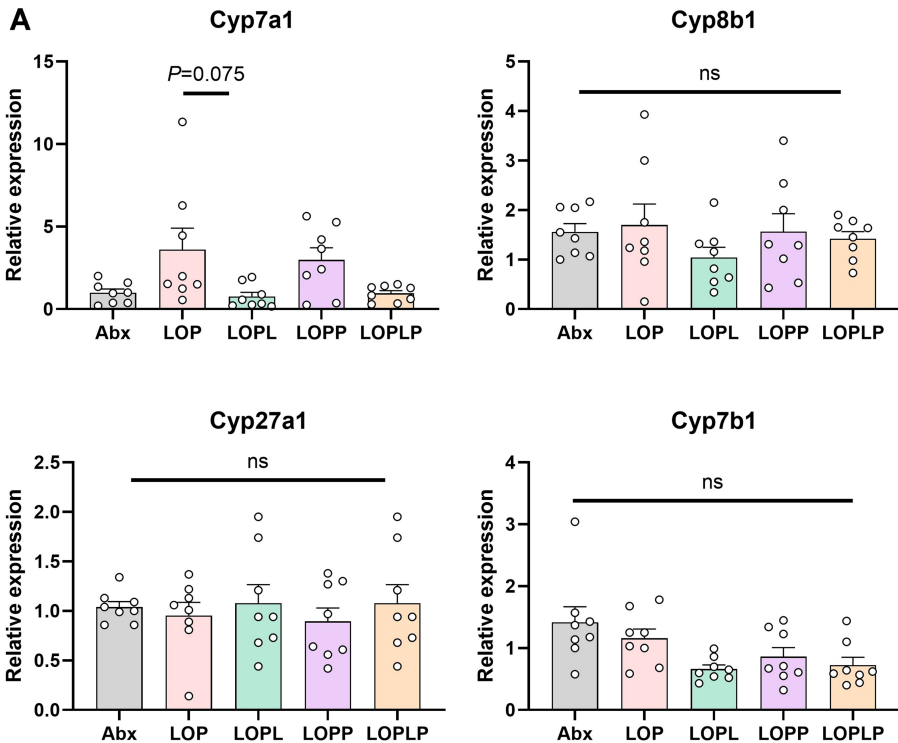

Supplement: d4fo04444d3.pdf [file d4fo04444d3.pdf]
